# Supplementary material for: New highly brominated Mn-porphyrin: a good catalyst for activation of inert C–H bonds
Source: Royal Society of Chemistry journal article supplement (doi:10.1039/c5ra20690a), 2015-01-01
Supplement: c5ra20690a1.pdf [file c5ra20690a1.pdf]

## Electronic Supplementary Information

### New highly brominated Mn-porphyrin: A good catalyst for activation of inert C-H bond

Vinicius Santos da Silva<sup>a</sup>, Geani Maria Ucoski, Shirley Nakagaki<sup>b</sup>, Ynara Marina Idemori<sup>a</sup>,  
Gilson DeFreitas-Silva<sup>a\*</sup>.

<sup>a</sup>Departamento de Química, Instituto de Ciências Exatas, Universidade Federal de Minas Gerais, 31270-901. Belo Horizonte, MG, Brazil. <sup>b</sup>Laboratório de Bioinorgânica e Catálise, Departamento de Química –Centro Politécnico, Universidade Federal do Paraná (UFPR), 81531980. Curitiba, PR, (Brazil).

The free-base porphyrin (H<sub>2</sub>T3,5DMPP) (Fig. S1) was characterized by <sup>1</sup>H NMR (Fig. S2), which showed that the porphyrin contained two methoxy (-OCH<sub>3</sub>) groups in the two *meta-mesoaryl* positions of the macrocycle. No chlorine emerged during the synthesis; indeed, integration of the signal relative to the β-pyrrole hydrogens evidenced the presence of eight hydrogen atoms. The signal at 1.55 refers to water in CDCl<sub>3</sub>.

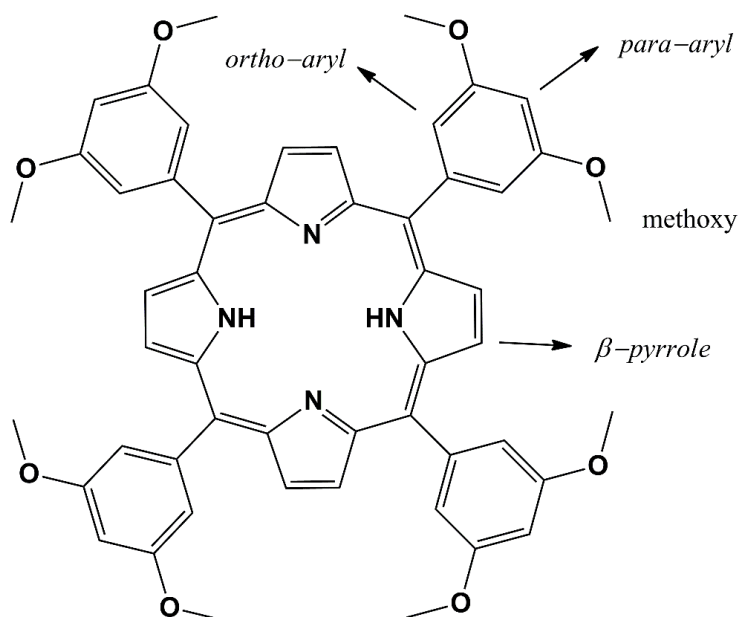

**Figure S1.** Structural representation of the free-base porphyrin (H<sub>2</sub>T3,5DMPP).

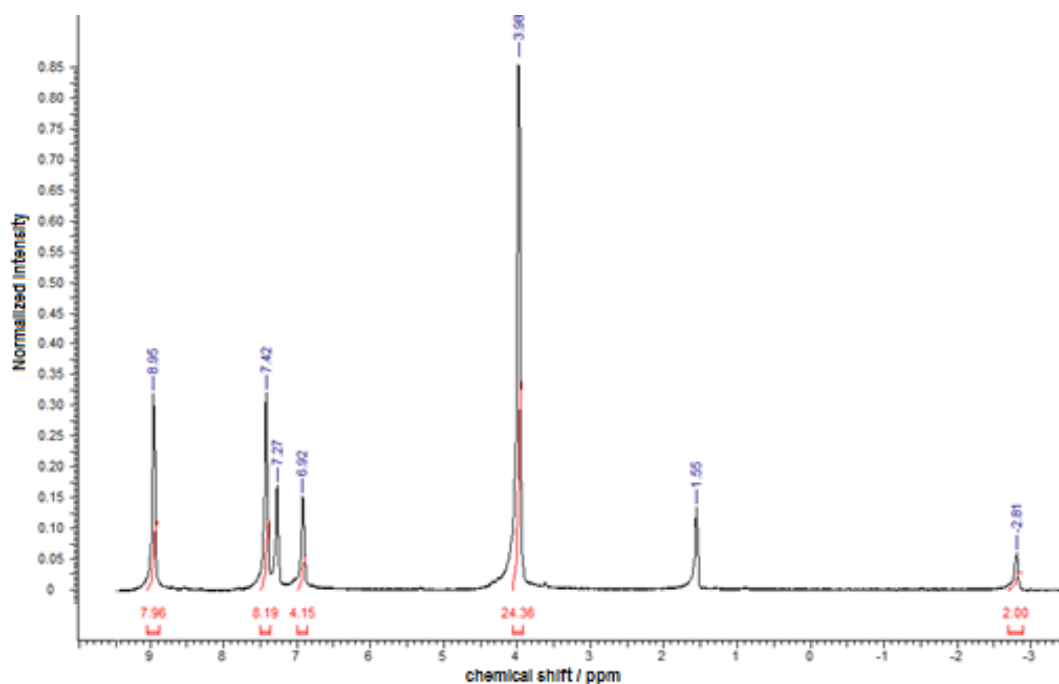

**Figure S21.**  $^1\text{H}$  NMR spectrum of  $\text{H}_2\text{T3,5DMPP}$  recorded at 200 MHz, in  $\text{CDCl}_3$ .  $\delta$  8.95 (s, 8H,  $\beta$ -pyrrole), 7.42 (s, 8H, *ortho*-aryl), 6.92 (s, 4H, *para*-aryl), 3.98 (s, 24H, methoxy), -2.81 (s, 2H, pyrrole NH).

The UV-vis spectrum of Cat.2 in DMF (Fig. S3) is typical of a brominated MnP bearing Mn(II).

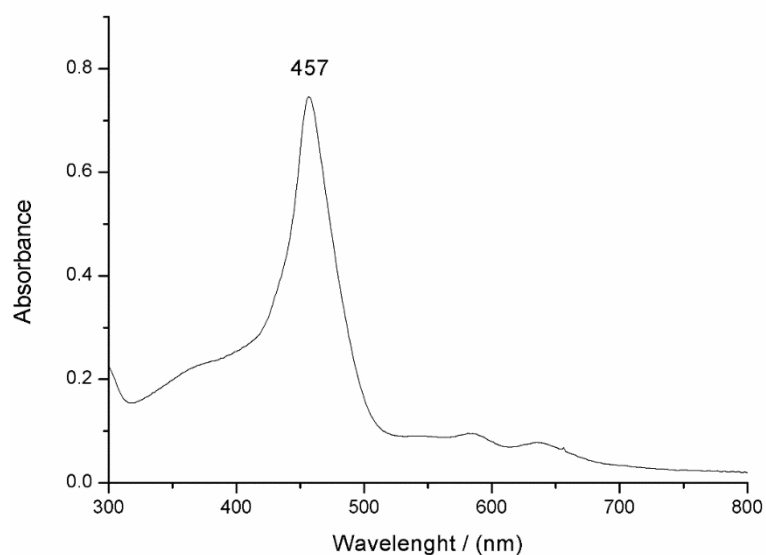

**Figure S3.** UV-vis spectrum of  $[\text{Mn}^{\text{III}}\text{Br}_{12}\text{T3,5DMPP}]\text{Cl}$  in DMF.

FTIR results confirmed formation of the free-base porphyrin, Cat.1, and Cat.2 (Figure S4).

$[\text{Mn}^{\text{III}}\text{T3,5DMPP}]\text{Cl}$ : FTIR in KBr ( $\text{cm}^{-1}$ ): (1593)  $\delta$  C=C; (1206)  $\nu$  C-O-C; (1155)  $\nu$   $\text{OCH}_3$ ; (1009)  $\delta$  Mn-N (pyrrole).

[Mn<sup>III</sup>Br<sub>12</sub>T<sub>3</sub>,5DMPP]Cl: FTIR in KBr (cm<sup>-1</sup>): (1569) δ C=C; (1277) δ C<sub>β</sub>-Br; (1210) ν C-O-C, (1155) ν OCH<sub>3</sub>; (1022) δ Mn-N(pyrrole).

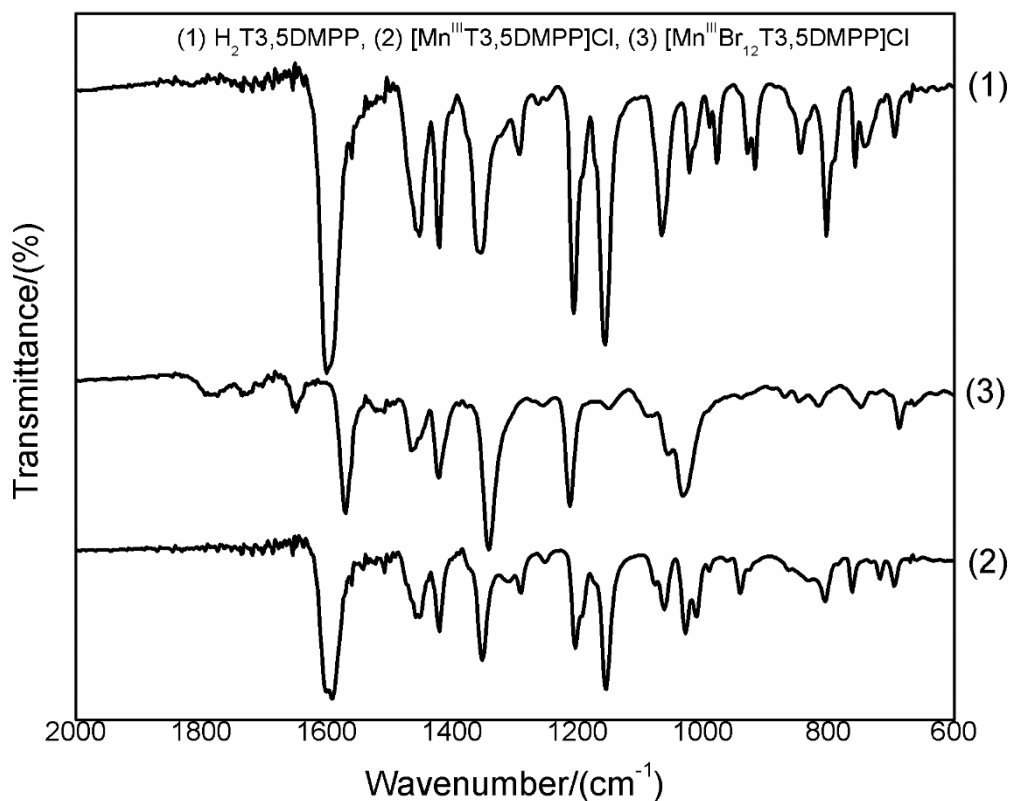

**Figure S4.** FTIR spectrum of H<sub>2</sub>T<sub>3</sub>,5DMPP (1), [Mn<sup>III</sup>T<sub>3</sub>,5DMPP]Cl (2); and [Mn<sup>III</sup>Br<sub>12</sub>T<sub>3</sub>,5DMPP]Cl (3) in KBr pallets.

The mass spectrum obtained for Cat.2 by electrospray ionization (ESI) in the positive mode revealed a peak at *m/z* 1886.02, with 100% relative intensity (Figure S5).

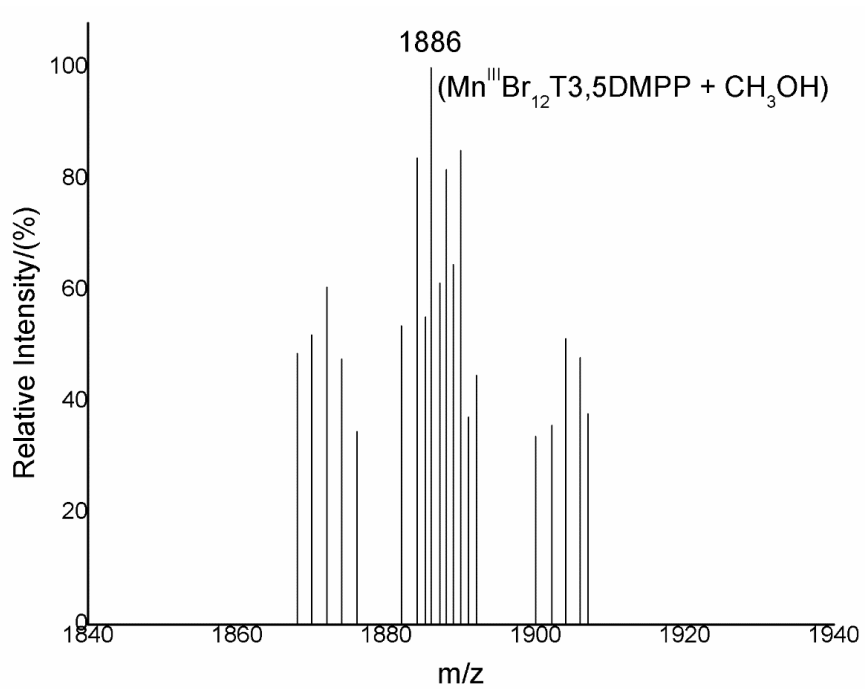

**Figure S5.** (a) Mass spectrum of  $[\text{Mn}^{\text{III}}\text{Br}_{12}\text{T}_{3,5}\text{DMPP}]\text{Cl}$ . Analysis conducted in  $\text{CH}_3\text{OH}$  with the ESI-MS operating in the positive mode.
